## Sensitivity of Herpes Simplex Virus Types 1 and 2 to Three Preparations of Human Interferon

### Data Base

**Legend.** Sensitivity of herpes simplex virus (HSV) types 1 and 2, Sindbis virus, and vesicular stomatitis virus to three preparations of human interferon (HuIFN).

| Viral strains              | Titer of HuIFN (units)      |                                   |                             |
|----------------------------|-----------------------------|-----------------------------------|-----------------------------|
|                            | NDV-induced leukocyte HuIFN | Poly I:C-induced fibroblast HuIFN | PHA-induced leukocyte HuIFN |
| <b>HSV type 1</b>          |                             |                                   |                             |
| McIntyre                   | 260 ± 453                   | 1,720 ± 786                       | 30 ± 33                     |
| E 115                      | 310 ± 236                   | 1,200 ± 258                       | 30 ± 36                     |
| E 337                      | 580 ± 378                   | 3,570 ± 1,696                     | 140 ± 251                   |
| HL 3                       | 450 ± 241                   | 1,950 ± 1,542                     | 100 ± 148                   |
| HL 4                       | 350 ± 310                   | 2,010 ± 1,071                     | 70 ± 96                     |
| HL 9                       | 650 ± 707                   | 2,070 ± 1,532                     | 60 ± 79                     |
| HL 17                      | 400 ± 177                   | 3,230 ± 861                       | 150 ± 184                   |
| HL 34                      | 1,070 ± 933                 | 1,900 ± 551                       | 30 ± 23                     |
| HG 9                       | 960 ± 1,445                 | 1,490 ± 370                       | 160 ± 167                   |
| Wilson                     | 1,590 ± 2,657               | 3,690 ± 1,258                     | 100 ± 127                   |
| Mean of means ± SEM        | 660 ± 402                   | 2,280 ± 838                       | 90 ± 48                     |
| <b>HSV type 2</b>          |                             |                                   |                             |
| MS                         | 3,790 ± 4,360               | 3,410 ± 978                       | 180 ± 114                   |
| X-79                       | 1,800 ± 1,810               | 5,710 ± 5,267                     | 90 ± 22                     |
| HG 43                      | 3,520 ± 3,371               | 13,190 ± 9,271                    | 160 ± 4                     |
| HG 44                      | 2,790 ± 2,345               | 3,820 ± 1,264                     | 170 ± 112                   |
| HG 53                      | 530 ± 392                   | 3,410 ± 1,330                     | ND                          |
| Heeter                     | 1,840 ± 837                 | 6,370 ± 4,022                     | 150 ± 79                    |
| Holt                       | 2,170 ± 1,421               | 4,200 ± 474                       | 170 ± 88                    |
| Turner                     | 1,570 ± 1,945               | 5,810 ± 1,579                     | 160 ± 83                    |
| Jensen                     | 970 ± 725                   | 14,900 ± 12,363                   | 120 ± 89                    |
| Mean of means ± SEM        | 2,110 ± 1,029               | 6,760 ± 4,047                     | 150 ± 28                    |
| Sindbis virus              | 1,450 ± 617                 | 4,350 ± 1,857                     | 90 ± 31                     |
| Vesicular stomatitis virus | 1,140 ± 81                  | 4,160 ± 614                       | ND                          |

NOTE. A 50% plaque-reduction end-point assay was used to test each viral strain against duplicate 1-ml aliquots of serial fourfold dilutions of HuIFN in human foreskin fibroblasts. The three HuIFN preparations were induced by Newcastle disease virus (NDV), polyinosinic-polycytidylic acid (Poly I:C), and phytohemagglutinin (PHA). HSV strains designated McIntyre, E 115, E 337, MS, and X-79 are multiply tissue culture-passaged laboratory strains; the remaining strains are recent clinical isolates (HL = oral isolates; HG and other strains with names = genital isolates). The international reference HuIFN (National Institutes of Health, Bethesda, Md.), with a designated titer of 20,000 units, was titrated at 20,100 units against Sindbis virus in this assay system (mean of nine experiments). Data are expressed as the mean ± sd of three to five experiments. ND = not done.

### Summary

Ten isolates of herpes simplex virus (HSV) type 1 and nine isolates of HSV type 2 were tested against virus-induced ( $\alpha$ ), fibroblast ( $\beta$ ), and mitogen-induced ( $\gamma$ ) preparations of human interferon (HuIFN). HSV type 2 was slightly more sensitive and HSV type 1 somewhat less sensitive to all three preparations of HuIFN than Sindbis and vesicular stomatitis virus—both considered to be quite sensitive to HuIFN. HSV type 2 was significantly more sensitive than HSV type 1 to each of the HuIFN preparations ( $P < 0.01$ ; Mann-Whitney rank-sum test). Clinical isolates did not appear to differ from laboratory strains. These results indicate that both HSV

types 1 and 2 are sensitive to the three different preparations of HuIFN. HuIFN may have a role in natural recovery from and may have potential as an antiviral chemotherapeutic agent in HSV infections in humans.

JAMES C. OVERALL, JR.

*Howard Hughes Medical Institute Laboratories*

TZE-JOU YEH

EARL R. KERN

*Department of Pediatrics*

*University of Utah*

*Salt Lake City, Utah*
